# Supplementary material for: Practice of death surveillance and response for maternal, newborn and child health: a framework and application to a South African health district
Source: PubMed Central journal article supplement — BMJ Open. 2021 May 5;11(5):e043783. doi: 10.1136/bmjopen-2020-043783 (PMC8103944; doi:10.1136/bmjopen-2020-043783), 2021-05-05
Supplement: bmjopen-2020-043783supp001.pdf [file bmjopen-2020-043783supp001.pdf]

**Title: Forms and functioning of local accountability mechanisms for maternal, newborn and child health: A case study of Gert Sibande District, South Africa**

| <b>Interview Guide – Accountability – Review meetings</b>                                                                                                                              |                                                                                                                                                                                                                                                                                                                                                                                                                                                                                                                                                                                                                                                                                                                                                                                                                                                                                                                                                                                                                            |
|----------------------------------------------------------------------------------------------------------------------------------------------------------------------------------------|----------------------------------------------------------------------------------------------------------------------------------------------------------------------------------------------------------------------------------------------------------------------------------------------------------------------------------------------------------------------------------------------------------------------------------------------------------------------------------------------------------------------------------------------------------------------------------------------------------------------------------------------------------------------------------------------------------------------------------------------------------------------------------------------------------------------------------------------------------------------------------------------------------------------------------------------------------------------------------------------------------------------------|
| <b>A. ACCOUNTABILITY</b>                                                                                                                                                               |                                                                                                                                                                                                                                                                                                                                                                                                                                                                                                                                                                                                                                                                                                                                                                                                                                                                                                                                                                                                                            |
| <b>Introduction</b>                                                                                                                                                                    | <ul style="list-style-type: none"> <li>▪ Can you tell me about your current position/role in the (district) health system?</li> </ul> <p><i>Probes: For how long have you been in that position?</i></p>                                                                                                                                                                                                                                                                                                                                                                                                                                                                                                                                                                                                                                                                                                                                                                                                                   |
| <b>Accountability definition</b>                                                                                                                                                       | <ul style="list-style-type: none"> <li>▪ Could you describe to me what accountability means to you?</li> </ul> <p><i>Probes: What does it make you think of accountability? What does it mean 'being accountable to'?</i></p> <p><i>How would you relate your definition of accountability to MNCH?</i></p>                                                                                                                                                                                                                                                                                                                                                                                                                                                                                                                                                                                                                                                                                                                |
| <b>Challenges</b>                                                                                                                                                                      | <p>Can you share some of the challenges that you face while performing your tasks as a health professional (or mid-level manager) within your district?</p> <p><i>Probes: Health Systems challenges/Challenges related to clients &amp; Community/Personal challenges</i></p>                                                                                                                                                                                                                                                                                                                                                                                                                                                                                                                                                                                                                                                                                                                                              |
| <ul style="list-style-type: none"> <li>- <b>Line/forms,</b></li> <li>- <b>Guidelines</b></li> <li>- <b>Enablers</b></li> <li>- <b>Barriers</b></li> <li>- <b>Complaints</b></li> </ul> | <ul style="list-style-type: none"> <li>▪ In your working area, to whom do you think you are accountable and why?</li> </ul> <p><i>Probes:</i></p> <ul style="list-style-type: none"> <li>- <i>Tell me about the reporting structure with regard to your role in the health systems?</i></li> <li>- <i>To/from whom do you report/receive order/provide information/provide technical support/training/supervision</i></li> </ul> <ul style="list-style-type: none"> <li>▪ Are there any accountability guidelines/framework from the DOH that you are using? <i>[If yes, please describe]</i></li> <li>▪ What are the enabling and limitation factors of the current accountability processes?</li> <li>▪ Does the District/Sub-district/Hospital/PHC Management Team have a mechanism in place to handle clients' complaints? How does it work?</li> <li>▪ Can you describe how voice of the vulnerable (and of the community) is being represented within the Health System/clinic committee/ Hospital Board?</li> </ul> |
| <b>Team</b>                                                                                                                                                                            | <ul style="list-style-type: none"> <li>▪ What's your experience/perception regarding teamwork and accountability for MNCH?</li> </ul> <p><i>Probes:</i></p> <ul style="list-style-type: none"> <li>- <i>Can you tell me about the team members/actors involved in the accountability processes for MNCH (Probe: Level)</i></li> <li>- <i>How will you characterise the attitude and commitment of teamwork regarding MNCH</i></li> <li>- <i>What's your beliefs regarding MNCH and the value of accountability</i></li> </ul>                                                                                                                                                                                                                                                                                                                                                                                                                                                                                              |

UWC-Study: Ethics: BM17/10/8 – MP Province: MP\_201820\_004

**Title: Forms and functioning of local accountability mechanisms for maternal, newborn and child health: A case study of Gert Sibande District, South Africa**

|                                 |                                                                                                                                                                                                                                                                                                                                                                                                                                                                                                                               |
|---------------------------------|-------------------------------------------------------------------------------------------------------------------------------------------------------------------------------------------------------------------------------------------------------------------------------------------------------------------------------------------------------------------------------------------------------------------------------------------------------------------------------------------------------------------------------|
|                                 | <ul style="list-style-type: none"> <li>▪ How do you perceive the performance of the team with regard to MNCH?</li> </ul> <p><i>Probes:</i></p> <ul style="list-style-type: none"> <li>- <i>Do you share the same goals? How do you set up these goals [decision making process]</i></li> <li>- <i>Can you comment on the level of participation and collaboration work environment?</i></li> <li>- <i>How do you monitor group accountability for MNCH</i></li> </ul>                                                         |
| <b>Adverse events</b>           | <ul style="list-style-type: none"> <li>▪ How do you perceive a case of adverse event (e.g. maternal or child death) as a team and/or individual?</li> </ul> <p><i>Probes:</i></p> <ul style="list-style-type: none"> <li>- <i>Please elaborate</i></li> <li>- <i>How is the climate within your team when it comes to adverse event?</i></li> </ul> <ul style="list-style-type: none"> <li>▪ When you have to justify/explain/answer on an adverse event, how do you perceive the role of team members (peers)?</li> </ul>    |
|                                 | <ul style="list-style-type: none"> <li>▪ How would you characterise the role of the investigation team regarding an adverse event? [Team: DCST, Province, or other]</li> </ul> <p><i>Probes:</i></p> <ul style="list-style-type: none"> <li>- <i>Does the investigation result in sanctions and/or learning? [Please elaborate]</i></li> <li>- <i>If learning, how often does the training happen? By Whom?</i></li> <li>- <i>How do you identify areas for improvement [beside when an adverse event occurs]?</i></li> </ul> |
| <b>Improvement</b>              | <ul style="list-style-type: none"> <li>▪ If you are given all the means to improve accountability, how would you go for it and what would you prioritize?</li> <li>▪ In your view, what can be done regarding accountability to improve MNCH outcomes?</li> </ul>                                                                                                                                                                                                                                                             |
| <b>B. DEATH REVIEW MEETINGS</b> |                                                                                                                                                                                                                                                                                                                                                                                                                                                                                                                               |
| <b>Actors/Who?</b>              | <ul style="list-style-type: none"> <li>▪ Can you please describe who attends the meeting?</li> </ul> <p><i>Probe:</i></p> <ul style="list-style-type: none"> <li>- <i>Who are the actors from district office, hospital, PHC? Doctors vs Nurses and/or others?</i></li> </ul>                                                                                                                                                                                                                                                 |
| <b>Meeting</b>                  | <ul style="list-style-type: none"> <li>▪ How would you describe the structure of the meeting?</li> </ul> <p><i>Probe:</i></p> <ul style="list-style-type: none"> <li>- <i>Who chairs, the agenda, how long, frequency, participation/engagement?</i></li> <li>- <i>What are the drivers/facilitators/barriers to this [name] meeting and related processes?</i></li> </ul>                                                                                                                                                    |

**Title: Forms and functioning of local accountability mechanisms for maternal, newborn and child health: A case study of Gert Sibande District, South Africa**

|                                             |                                                                                                                                                                                                                                                                                                                                                                                                                                                                                                                                                                                                                                                                    |
|---------------------------------------------|--------------------------------------------------------------------------------------------------------------------------------------------------------------------------------------------------------------------------------------------------------------------------------------------------------------------------------------------------------------------------------------------------------------------------------------------------------------------------------------------------------------------------------------------------------------------------------------------------------------------------------------------------------------------|
|                                             | <ul style="list-style-type: none"> <li>- <i>What, from your perspective, is the difference between MRU, PPIP/CHIP and other review meetings [name]?</i></li> </ul>                                                                                                                                                                                                                                                                                                                                                                                                                                                                                                 |
| <b>Decision process</b>                     | <ul style="list-style-type: none"> <li>▪ How would you describe the decision process during the [name] meeting?</li> </ul> <p><i>Probes:</i></p> <ul style="list-style-type: none"> <li>- <i>What happens? What do you discuss? How do the discussions of the meetings lead to decision or [positive] results (for actions)?</i></li> </ul>                                                                                                                                                                                                                                                                                                                        |
| <b>Dealing with adverse events (deaths)</b> | <ul style="list-style-type: none"> <li>▪ How do you deal with adverse events e.g. maternal or child death?</li> </ul> <p><i>Probes:</i></p> <ul style="list-style-type: none"> <li>- <i>Can you describe the situation of maternal, neonatal and child death (mortality) in this area since you started in your position?</i></li> <li>- <i>Can you share from your experience an example of an adverse event (maternal or child death) and how was the process of enquiry?</i></li> <li>- <i>How do you see the problem of death in terms of accountability?</i></li> <li>- <i>Do you have/know any policy/guideline for dealing with death event?</i></li> </ul> |
|                                             | <ul style="list-style-type: none"> <li>▪ How do you see the role of the [name] meeting as a structure that is facilitating/supporting accountability processes for MNCH?</li> </ul> <p><i>Probes:</i></p>                                                                                                                                                                                                                                                                                                                                                                                                                                                          |
|                                             | <ul style="list-style-type: none"> <li>▪ How would you describe the role of communities in addressing MNCH problems?</li> <li>▪ How would you describe the role and level of engagement of PHC facilities?</li> </ul> <p><i>Probes:</i></p> <ul style="list-style-type: none"> <li>- <i>Referral processes</i></li> <li>- <i>Role of Provincial and National department of Health</i></li> </ul>                                                                                                                                                                                                                                                                   |
| <b>Actions/Outcomes</b>                     | <ul style="list-style-type: none"> <li>▪ What from your perspective are some of the key actions and outcomes on MNCH as a result of the [name] meeting?</li> </ul> <p><i>Probes:</i></p> <ul style="list-style-type: none"> <li>- <i>How sustainable are these actions? [Please elaborate]</i></li> </ul>                                                                                                                                                                                                                                                                                                                                                          |
| <b>Conclusion</b>                           | <ul style="list-style-type: none"> <li>- Remind Ethics and right to withdraw from the study at any time</li> <li>- Thanking the informant</li> </ul>                                                                                                                                                                                                                                                                                                                                                                                                                                                                                                               |
